# Supplementary material
Source: PubMed Central journal article supplement (PMC4260585)
Supplement: pnas.201420221SI.pdf [file pnas.201420221SI.pdf]

# Supporting Information

Xu et al. 10.1073/pnas.1420221111

## SI Materials and Methods

**Cell Culture and Reagents.** *Ape1*-null CH12F3-2A cells were obtained from Kefei Yu (Michigan State University, East Lansing, MI) (1). *Ape1*-null CH12F3-2A cells and CH12F3-2A–Bcl2 cells were cultured and stimulated for the indicated time as described (2). MRE11 inhibitor Mirin was purchased from Calbiochem (catalog no. 475954). Proteasome inhibitor Bortezomib was purchased from Janssen Pharmaceutical.

**Construction of Vectors and Generation of Cell Lines.** To make APE1 constructs and its mutants, the mouse APE1 gene was amplified by PCR and cloned into the SgfI/MluI sites of the pCMV6-Entry vector (Life Technologies). Mutant constructs were made by amplifying WT construct with the indicated primers (Table S3). For making stable cell lines, WT and APE1 mutants DNA were amplified from the pCMV6-Entry construct and cloned into the EcoRI/BamHI sites of the pEF1 $\alpha$ -IRES-ZsGreen vector (Clontech). Constructs were linearized with AseI (New England Biolabs) and introduced into *Ape1*-null CH12F3-2A cells by nucleofection (Lonza). After selection with G418 (Nacalai Tesque) for 1 wk, GFP-positive cells were sorted and used without limited dilution as stable lines expressing WT or mutant of APE1.

**Western Blot.** Cells were lysed with radioimmunoprecipitation assay buffer (10 mM Tris-HCl, pH 7.9, 150 mM NaCl, 0.1% SDS, 0.1% deoxycholate, 1% Triton X-100, and 1 mM EDTA), and the cell lysates were subjected to Western blot following the standard protocols with antibodies listed in Table S4.

**5' S $\mu$  Mutation Analysis.** Mutation analysis was performed as described (3) with minor modifications. Genomic DNA was prepared from cells stimulated with CIT for 72 h. A 625-bp region located 5' of core S $\mu$  was amplified with primers listed in Table S3 by using PrimeSTAR DNA polymerase (TaKaRa). The PCR product was cloned into pGEM-T easy vector (Promega) vector and sequenced with T7 primer by using an ABI 3130xl Genetic Analyzer (Applied Biosystems). The 565-bp sequence between the two primers was analyzed with Sequencher software (Gene Codes) for mutation.

**IgH/c-myc Translocation Analysis.** Genomic DNA was prepared from cells stimulated with CIT for 72 h, and IgH/c-myc translocation of derivative chromosome 15 was performed as described (4).

**ChIP.** Chromatin was prepared with the truChIP Chromatin Shearing Reagent Kit according to the manufacturer's instructions (Covaris; PN520127). In brief,  $1 \times 10^7$  cells in fixing buffer were fixed for 5 min in the presence of fresh 1% formaldehyde at room temperature, and then the reaction was stopped by quenching buffer for 5 min. Fixed cells were washed with cold PBS and lysed in lysis buffer for 10 min. After washing, nuclei pellet was suspended in shearing buffer, and sonication was performed with the S2 Focused-ultrasonicator (Covaris). Immunoprecipitation was performed overnight by incubating 35  $\mu$ g of chromatin with 3  $\mu$ g of antibody in the presence of protease inhibitors and phosphatase inhibitors as well as protein-G-conjugated magnetic beads (Life Technologies; 10004D). The pulled-down DNA was subjected to detection by real-time PCR and normalized to the amount of input. Primers and antibodies used are shown in Tables S3 and S4, respectively.

**S $\mu$ -S $\alpha$  Junction Analysis.** Genomic DNA was prepared from cells stimulated with CIT for 72 h. S $\mu$ -S $\alpha$  junction DNA was amplified by nested PCR using S $\mu$  and S $\alpha$  primers as listed in Table S2. A total of 1  $\mu$ L of first-round PCR product (25 cycles) was used for the second round of PCR (38 cycles). The PCR products, which spanned from 0.5 to 2 kb, were gel-extracted, cloned into pGEM-Teasy (Promega), and sequenced with T7 primer.

**The 3C Assay.** The 3C assay was performed as described (3, 5).

**siRNA Oligonucleotide Transfection.** Various Stealth RNAi oligonucleotides (Invitrogen) were introduced into CH12F3-2A cells by the Nucleofector 96-well electroporation system (Lonza) with the CM-150 program. As a negative control (siCont.), Stealth siRNA Negative Control (catalog no. 12935-300) was used. The Stealth siRNAs used in this study are listed in Table S3.

1. Masani S, Han L, Yu K (2013) Apurinic/apyrimidinic endonuclease 1 is the essential nuclease during immunoglobulin class switch recombination. *Mol Cell Biol* 33(7):1468–1473.

2. Nakamura M, et al. (1996) High frequency class switching of an IgM+ B lymphoma clone CH12F3 to IgA+ cells. *Int Immunol* 8(2):193–201.

3. Yousif AS, Stanlie A, Mondal S, Honjo T, Begum NA (2014) Differential regulation of S-region hypermutation and class-switch recombination by noncanonical functions of uracil DNA glycosylase. *Proc Natl Acad Sci USA* 111(11):E1016–E1024.

4. Ramiro AR, et al. (2004) AID is required for c-myc/IgH chromosome translocations in vivo. *Cell* 118(4):431–438.

5. Sabouri S, et al. (2014) C-terminal region of activation-induced cytidine deaminase (AID) is required for efficient class switch recombination and gene conversion. *Proc Natl Acad Sci USA* 111(6):2253–2258.



**Table S1. Mutation analysis for 5'Sμ region**

| APE1-Δ/Δ/Δ | Mutated/clones | Mutated/total bases | Mut. freq., ×10 <sup>-4</sup> | Del/ins |
|------------|----------------|---------------------|-------------------------------|---------|
| Vector     | 35/186         | 28/105090           | 2.66                          | 14      |
| WT         | 26/177         | 24/100005           | 2.40                          | 2       |
| Y170F      | 43/183         | 56/103395           | 5.42                          | 10      |

Del, deletion; Ins, insertion; mut. freq., mutation frequency.

**Table S2. Mutation bases for 5' Sμ region**

| Transfectants |       | To |   |    |    | Total | %    |
|---------------|-------|----|---|----|----|-------|------|
|               |       | G  | C | A  | T  |       |      |
| Vector        | G     | ■  | 5 | 11 | 1  | 17    | 92.9 |
|               | C     | 2  | ■ | 1  | 6  | 9     |      |
|               | A     | 1  | 0 | ■  | 0  | 1     |      |
|               | T     | 0  | 1 | 0  | ■  | 1     |      |
|               | Total |    |   |    |    | 28    |      |
| WT            | G     | ■  | 3 | 10 | 0  | 13    | 95.8 |
|               | C     | 1  | ■ | 1  | 8  | 10    |      |
|               | A     | 0  | 0 | ■  | 0  | 0     |      |
|               | T     | 0  | 1 | 0  | ■  | 1     |      |
|               | Total |    |   |    |    | 24    |      |
| Y170F         | G     | ■  | 8 | 19 | 6  | 33    | 96.4 |
|               | C     | 5  | ■ | 2  | 14 | 21    |      |
|               | A     | 0  | 0 | ■  | 0  | 0     |      |
|               | T     | 1  | 1 | 0  | ■  | 2     |      |
|               | Total |    |   |    |    | 56    |      |

**Table S3. List of primers and RNAi oligonucleotides used in this study**

| Primers                                                | Sequence, 5'–3'                    |
|--------------------------------------------------------|------------------------------------|
| <b>APE1 mutagenesis</b>                                |                                    |
| mAPE1-WT-Sgfl-F                                        | ATAGCGATCGCATGCCAAAGCGGGGAAAGAAAAG |
| mAPE1-WT-MluI-R                                        | CGCACGCGTCAGTGTAGGTAAAGGGTGATG     |
| mAPE1-K6R-K7R-F                                        | CGAAGAGCGCGCGCCGACGACG             |
| mAPE1-K6R-K7R-R                                        | TCCCGCTTTGGCATGCGATCG              |
| mAPE1-C64S-F                                           | TCCTCCTGGAATGTGGATGGGCTTC          |
| mAPE1-C64S-R                                           | TATCTTGAGTGTGGCAGATTGCCACTGG       |
| mAPE1-Y170F-F                                          | TTTGTTCCTCAATGCAGGCAGGGGTC         |
| mAPE1-Y170F-R                                          | GGCTGTTACCAGGACAAGGACTC            |
| ZsGreen-mAPE1-EcoRI-F                                  | TATGAATTTCATGCCAAAGCGGGGAAAGAAA    |
| ZsGreen-mAPE1-BamHI-R                                  | CGCGGATCCTTAAACCTTATCGTCGTCATC     |
| <b>5' Sm mutation</b>                                  |                                    |
| 5' S $\mu$ -seq-625bp-F                                | AATGGATACCTCAGTGGTTTTTAATGGTGG     |
| 5' S $\mu$ -seq-625bp-R                                | AGCGGCCCCGGCTCATTCCAGTTCATTACAG    |
| <b>IgH/c-myc translocation</b>                         |                                    |
| S $\mu$ 5'1a (first)                                   | ACTATGCTATGGACTACTGGGGTCAAG        |
| c-myc5'1a (first)                                      | GTGAAAACCGACTGTGGCCCTGGAA          |
| S $\mu$ 5'1b (second)                                  | CCTCAGTCACCGTCTCCTCAGGTA           |
| c-myc5'1b (second)                                     | GTGGAGGTGTATGGGGTGTAGAC            |
| c-myc probe                                            | GGACTGCGCAGGGAGACCTACAGGGG         |
| <b>Bio-dUTP break assay</b>                            |                                    |
| 5' S $\mu$ -F ( $\gamma$ H2AX ChIP)                    | AAGCTTGCTGAGCAAAATTAAGGGAACAAGG    |
| 5' S $\mu$ -R ( $\gamma$ H2AX ChIP)                    | GTCTACTTCATTTTGGCTCAAGCCCAGCTTT    |
| 3' S $\mu$ -F ( $\gamma$ H2AX ChIP)                    | TGGCCAGAACCAGAATCAATT              |
| 3' S $\mu$ -R ( $\gamma$ H2AX ChIP)                    | GCCTCACATAATCCATGTACGCTA           |
| S $\gamma$ 1-F                                         | GCAATGCTTCTGTCTGTAGACAAGA          |
| S $\gamma$ 1-R                                         | CCCGGATTCGCCGTGAGGACAGAGGCT        |
| $\beta$ 2m-F (ChIP)                                    | GGTGACGACCTCCGGATCTG               |
| $\beta$ 2m-R (ChIP)                                    | GCCGAGTAGCAGCCACTGAAA              |
| <b>ChIP assay</b>                                      |                                    |
| S $\mu$ -F                                             | TAGTAAGCGAGGCTCTAAAAAGCAC          |
| S $\mu$ -R                                             | ACTCAGAGAAGCCACCCAT                |
| C $\mu$ -F                                             | CTGAACCTGAGGGAGTCAGC               |
| C $\mu$ -R                                             | GCCACTGCACACTGATGTCT               |
| S $\alpha$ -F                                          | CTTGGCTAGGCTACAATGGATTGAGC         |
| S $\alpha$ -R                                          | GTGCAACTCTATCTAGGTCTGCCCGGT        |
| C $\alpha$ -F                                          | GCCAGCTGTCGAGTGCCAG                |
| C $\alpha$ -R                                          | CACCCCAAGCTGACCCCTA                |
| <b>LM-PCR assay</b>                                    |                                    |
| LMPCR.1                                                | GCGGTGACCCGGGAGATCTGAATTC          |
| LMPCR.2                                                | GAATTCAGATC                        |
| 5' S $\mu$ -F                                          | GCAGAAAATTTAGATAAAATGGATACCTCAGTGG |
| 5' S $\mu$ -probe                                      | DIG-AGGGACCCAGGCTAAGAAGGCAAT       |
| <b>S<math>\mu</math>-S<math>\alpha</math> junction</b> |                                    |
| S $\mu$ JxnF (first)                                   | GTATCAAAGGACAGTGCTTAGATCCGAGGT     |
| S $\alpha$ JxnR (first)                                | GATACTAGGTTGCATGGCTCCATTCACACA     |
| S $\mu$ JxnF (second)                                  | TTGAGAGCCCTAGTAAGCGAGGCTCTA        |
| S $\alpha$ JxnR (second)                               | GAACTGTGAATAAGTCCAGTCATGCTAAT      |
| <b>3C assay</b>                                        |                                    |
| S $\mu$                                                | GCTGACATGGATTATGTGAGG              |
| S $\alpha$                                             | GCCTAGCCCAGACCATGCCA               |
| GAPDH-F                                                | CAGTAGACTCCACGACATAC               |
| GAPDH-R                                                | AGTAGTGCGTTCTGTAGATTCC             |
| <b>Stealth RNAi oligo</b>                              |                                    |
| siTDP1 (ID: MSS200510)                                 | UGGAGUUGUACUUUCCUUAAUCC            |
| siMRE11 (ID: MSS206767)                                | AAGUGAUUCACAACCCAGCACAGC           |
| siCtIP (ID: MSS212779)                                 | UGUCCGAUCAAAUUAUUCUUCUAGG          |

**Table S4. List of antibodies used in this study**

| Antibody               | Catalog no.  | Supplier            |
|------------------------|--------------|---------------------|
| APE1 (13B8E5C2)        | ab194        | Abcam               |
| Flag (M2)              | F-3165       | Sigma               |
| phospho-H2A.X (Ser139) | 05-636       | Millipore           |
| Ku80 (M-20)            | sc-1484      | Santa Cruz          |
| Msh2 (N-20)            | sc-494       | Santa Cruz          |
| Mouse IgG              | sc-2025      | Santa Cruz          |
| MRE11 (18)             | sc-135992    | Santa Cruz          |
| CtIP                   | ab70163      | Abcam               |
| TDP1                   | NB100-81642  | Novus Biologicals   |
| Tubulin (DM1A)         | CP06         | Calbiochem          |
| Brd4                   | A301-985A100 | Bethyl Laboratories |
